# Supplementary material
Source: publisher figshare collection journal article supplement (https://frontiersin.figshare.com/ndownloader/files/34425986)

Caspase-1

Original  
image 1

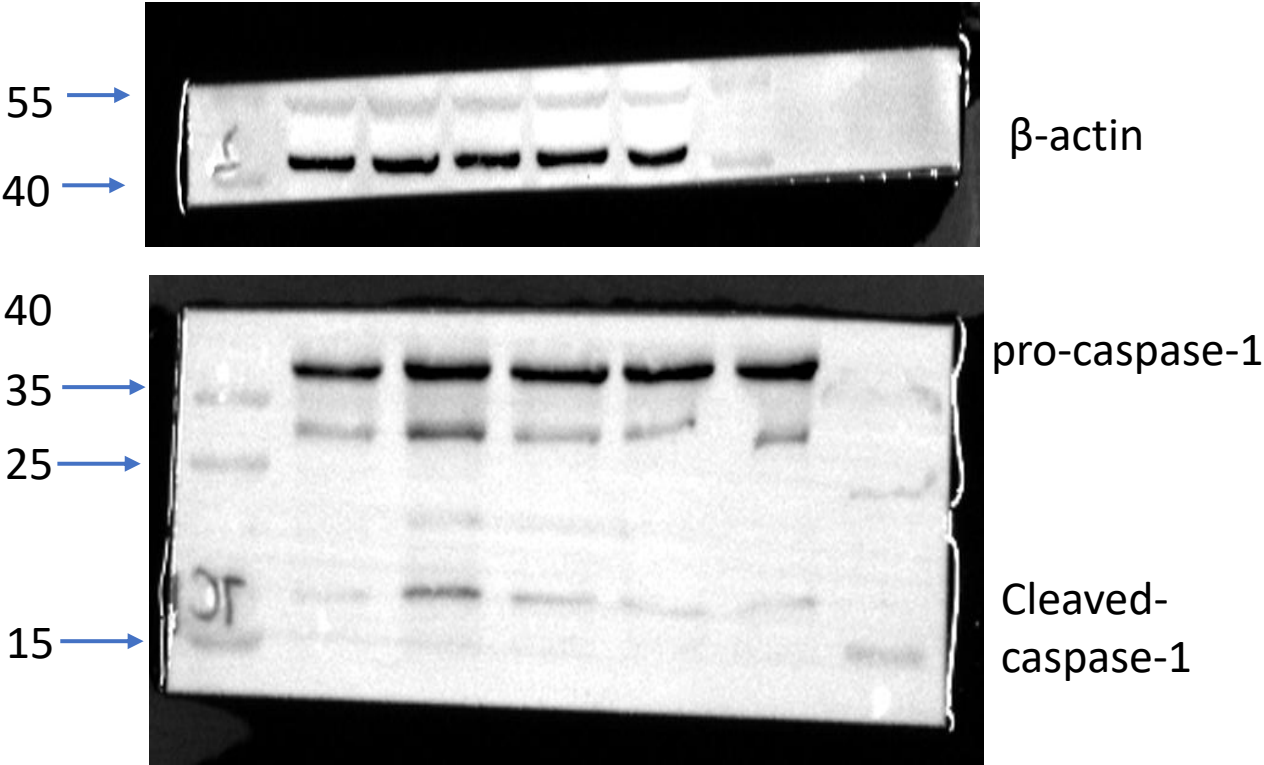

Original  
image 2

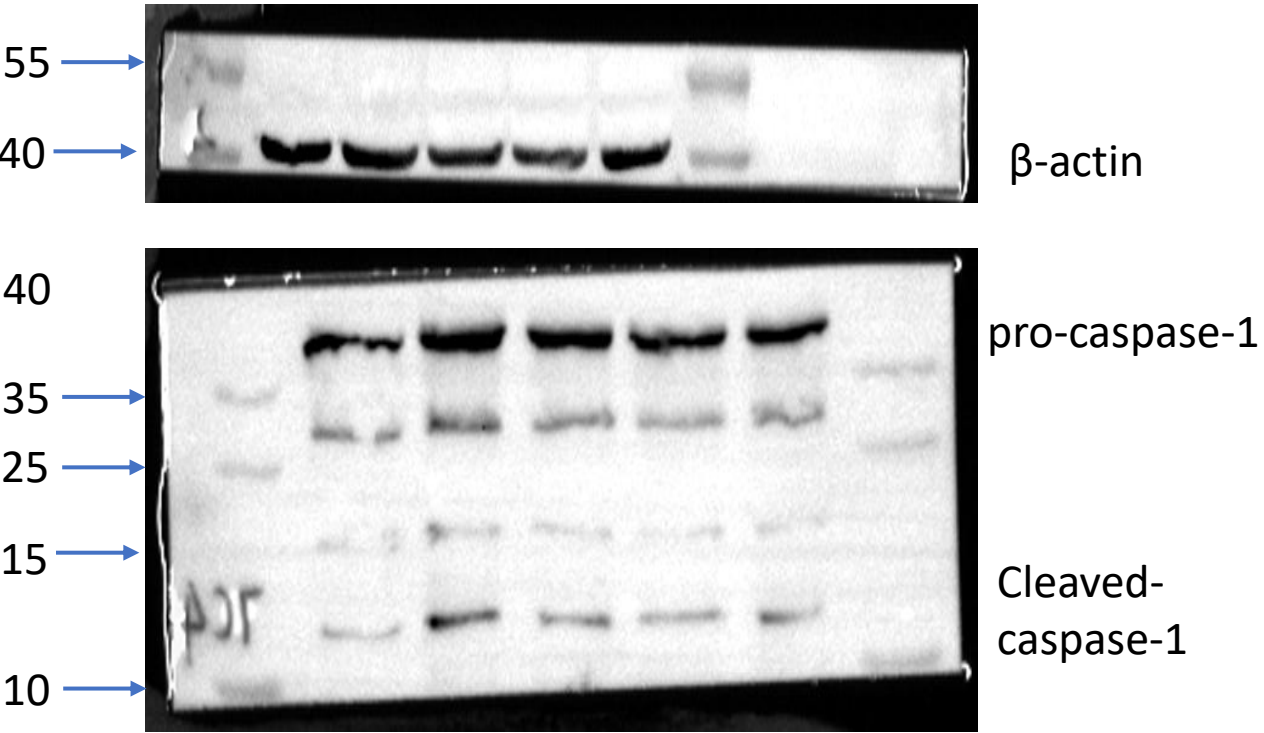

Original  
image 3

55 →  
40 →

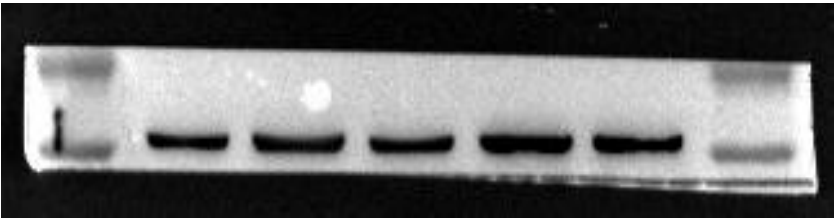

$\beta$ -actin

40  
35 →  
25 →  
15 →

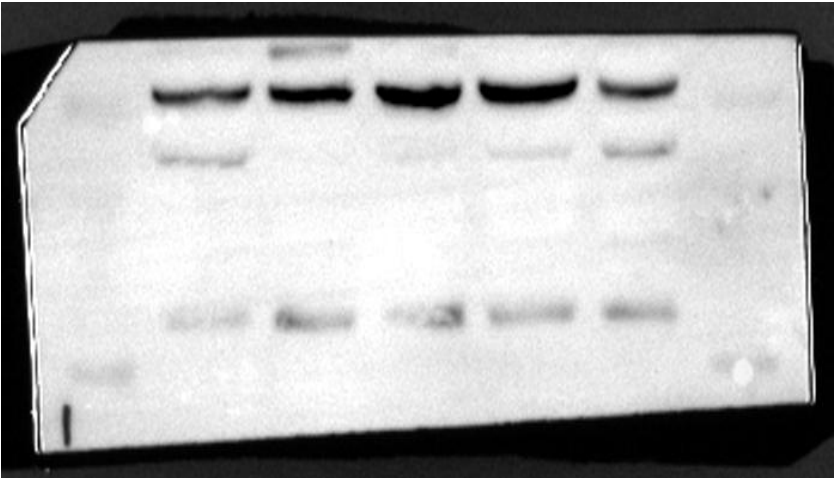

pro-caspase-1

Cleaved-  
caspase-1

Supplement: Supplementary file 1 [file 34425986]
